# Supplementary material for: Phase II Study of Gemcitabine, Peg-Asparaginase, Dexamethasone and Methotrexate Regimen for Newly Diagnosed Extranodal Natural Killer/T-Cell Lymphoma, Nasal Type: Final Analysis With Long-Term Follow-Up and Rational Research for the Combination
Source: Front Oncol. 2022 Jan 24;12:796738. doi: 10.3389/fonc.2022.796738 (PMC8818987; doi:10.3389/fonc.2022.796738)
Supplement: Supplementary file 1 [file Table_1.xlsx]

## Sheet: Sheet1
patient ID	Sex	Age	ECOG	B symptoms	LDH	EBV DNA	CRP	Stage	Involvement	PINKE	KPI	IPI	Response after 2 cycles	Response after 4 cycles	Response after 6 cycles	Radiotherapyornot	the time of radiotherapy(the cycles after the chemotherapy)	Enrollment time	the last follow up time	Relapse（1）or not（0）	Time of relapse	PFS（months)	death（1）or not（0）	Time of death	OS(months)	follow up interval(months)	12h plasma MTX concentration during the 1st cycle	24h plasma MTX concentration during the 1st cycle	12/24h plasma MTX concentration ratio(12h plasma MTX concentration/24h plasma MTX concentration)	36h plasma MTX concentration during the 1st cycle	48h plasma MTX concentration during the 1st cycle	toxicity	NEU-min	LY-min	Hb-min	PLT-min	ALB-min	AST-max	ALT-max	TB-max	Cr-max	Fbg-max	Mucositis	Vomiting	Epistaxis	Abdominal pain	Pancreatitis
263761	F	58	1	1	214.6	2.04*10^3	12.41	1	bilateral nasal cavity	1	1	0	CR	CR	CR	1	3	2013-11-25	2019-06-17	0	2019-06-17	67.2854	0	2019-06-17	67.2854	67.2854	8.43*10^-5	5.96*10^-7	141.443	3.01*10^-7	<1.0*10^-7		1.9	1.1	86.1	238	33.5	45.7	70.6	8.4	68	3.23	0	0	0	0	0
265336	F	51	1	1	240.8	0	3.5	2	nasopharynx，bilateral cervica LN	1	2	0	CR	CR	CR	1	3	2013-12-03	2019-06-17	0	2019-06-17	66.4312	0	2019-06-17	66.4312	66.4312	4.56*10^-4	2.0*10^-6	228	2.42*10^-7	9.02*10^-5		0.4	0.5	64.9	53	20.8	50.7	81.5	50.2	343.9	0.7	2	0	0	0	0
264674	M	32	0	0	198.3	0	0.83	1	right nasal cavity	0	0	0	CR	CR	CR	1	3	2013-12-06	2019-06-17	0	2019-06-17	66.3326	0	2019-06-17	66.3326	66.3326	1.28*10^-4	4.14*10^-7	309.179	7.68*10^-7	2.34*10^-7		2	1	112	140	32.4	78.5	188.7	20.3	98	2.8	0	0	0	0	0
265190	M	56	1	1	193.6	1.64*10^2	0.33	2	bilateral nasal cavity	1	1	0	CR	CR	CR	1	3	2013-12-24	2019-06-17	0	2019-06-17	65.7413	0	2019-06-17	65.7413	65.7413	2.86*10^-4	4.29*10^-7	666.667	9.54*10^-7	<1.0*10^-7		1.1	0.8	105	135.8	33.7	82.9	123.7	12.6	99.5	1.81	1	0	0	0	0
267398	M	46	1	1	615	6.2*10^5	38.81	4	bilateral nasal cavity,gum，bilateral cervica LN, adrenal, testis	4	4	3	PR	PD	-	0	-	2014-01-16	2019-06-17	1	2014-04-16	2.95688	0	2019-06-17	64.9856	64.9856	1.17*10^-3	3.97*10^-6	294.71	5.56*10^-7	<1.0*10^-7		0.1	0.4	57	2	20.6	207.3	388.9	96.8	92.7	1.15	2	2	0	1	0
267914	M	51	2	1	176.1	6.4*10^3	14.69	2	right nasal cavity，oropharynx ，bilateral cervica LN	1	2	1	CR	CR	CR	1	3	2014-02-07	2016-06-15	1	2015-02-28	12.6817	1	2015-12-15	22.2094	28.2218	1.52*10^-4	1.22*10^-6	124.59	3.87*10^-7	<1.0*10^-7		1.6	0.6	91	150	29.4	35.3	57.2	24.3	78.8	2.65	0	0	0	0	0
269890	M	48	1	1	153.3	3.97*10^4	12.01	4	maxillofacial，nasopharynx，oropharynx ，Iliac paravascular LN	3	3	2	PD	-	-	0	-	2014-03-18	2014-09-12	1	2014-05-20	2.06982	1	2014-06-10	2.75975	5.84805	9.05*10^-5	1.95*10^-6	46.41	<1.0*10-7	<1.0*10^-7		2.6	0.8	98	176	34.2	33.9	79.6	6	86.4	3.53	0	0	1	0	0
268961	M	61	2	1	198.6	1.88*10^4	7.31	2	root of tongue，right cervica LN	4	2	1	PR	-death of SAE	-death of SAE	0	-	2014-03-20	2016-02-23	0	2015-05-15	13.8316	1	2015-05-15	13.8316	23.1622	1.14*10^-4	2.63*10^-6	43.346	1.17*10^-6	3.74*10^-7		1.3	0.3	50	14.2	18.1	38.1	60.7	44.6	78.6	0.51	0	5	0	0	0
273209	M	49	1	0	226.9	2.17*10^5	70.87	1	right nasal cavity	1	0	0	CR	CR	CR	1	3	2014-05-07	2019-08-08	0	2019-08-08	63.0472	0	2019-08-08	63.0472	63.0472	1.38*10^-4	5.54*10^-7	249.097	<1.0*10^-7	<1.0*10^-7		1.5	0.5	74	52	25.1	107	205.1	55.5	75.5	3.87	0	0	0	0	0
274197	F	44	1	1	217	9.97*10^3	5.09	2	bilateral nasal cavity,palatine tonsil	1	1	0	PR	PR	PR	1	3	2014-04-04	2015-09-17	1	2015-09-08	17.1499	1	2015-09-08	17.1499	17.4456	9.69*10^-5	1.03*10^-6	94.0777	<1.0*10^-7	<1.0*10^-7		2	0.8	82.8	295	23.2	41.2	25.2	7.6	56.2	4.14	0	0	0	0	0
272736	M	40	0	0	162.1	0	3.13	4	left nasal cavity,intestine	1	1	2	CR	CR	CR	0	-	2014-04-14	2019-06-17	0	2019-06-17	62.0945	0	2019-06-17	62.0945	62.0945	8.12*10^-5	<1.0*10^-7	812	<1.0*10^-7	<1.0*10^-7		2.4	0.7	90	208	19.8	30.7	38.8	12.6	83.9	2.75	0	0	0	1	0
273631	M	63	1	0	158	9.33*10^4	13.94	1	back	3	0	1	CR	CR	CR	1	3	2014-05-20	2019-06-17	0	2019-06-17	60.9117	0	2019-06-17	60.9117	60.9117	9.87*10^-5	1.84*10^-7	536.413	<1.0*10^-7	<1.0*10^-7		0.9	1.8	75	130	29.1	61	81.5	21	69.3	3.5	0	0	0	0	0
276741	M	54	1	0	306.2	1.82*10^4	33.16	2	bilateral inguinal LN	3	2	1	PR	PR	CR	1	3	2014-06-18	2019-06-17	0	2019-06-17	59.9589	0	2019-06-17	59.9589	59.9589	7.62*10^-5	1.92*10^-7	396.875	2.39*10^-6	8.77*10^-7		0.9	0.4	72	21.5	24.1	40.6	51.9	65.4	142.3	1.16	2	0	0	0	0
276567	F	29	2	1	350.9	1.40*10^5	13.88	1	nasopharynx	1	2	1	PR	PR	CR	1	3	2014-06-27	2019-06-17	0	2019-06-17	59.6632	0	2019-06-17	59.6632	59.6632	1.11*10^-4	1.59*10^-7	698.113	6.52*10^-6	5.45*10^-6		0.3	0.5	53	15	25.3	45.4	62.9	20.7	59.5	3.87	0	1	0	0	0
279176	M	26	1	1	263.1	0	3.74	1	left nasal cavity	0	2	1	CR	CR	CR	1	3	2014-07-28	2019-06-17	0	2019-06-17	58.6448	0	2019-06-17	58.6448	58.6448	6.05*10^-5	3.51*10^-7	172.365	<1.0*10^-7	<1.0*10^-7		1.6	0.8	99	104	24.7	50.2	75.9	34.6	81.6	2.07	0	0	0	0	0
279528	M	34	1	1	179	0	1.23	1	nasopharyngeal posterior wall and right lateral wall	0	1	0	PR	PR	CR	1	4	2014-07-30	2019-06-17	0	2019-06-17	58.5791	0	2019-06-17	58.5791	58.5791	8.41*10^-5	4.96*10^-7	169.556	<1.0*10^-7	<1.0*10^-7		2	0.2	88	166	20.7	40.1	55.5	28.4	71.8	1.99	0	0	0	0	0
283014	F	30	1	1	173.8	3.36*10^4	25.59	2	nasopharynx，oropharynx	1	1	0	PR	PR	CR	1	3	2014-09-24	2019-08-08	1	2018-01-17	39.7864	0	2019-08-08	58.4476	58.4476	3.83*10^-4	1.16*10^-7	330.172	<1.0*10^-7	<1.0*10^-7		1.2	0.9	94	113	26.3	42.7	39.5	15	65.3	3.19	0	0	0	0	0
285063	M	64	1	0	205.1	2.32*10^3	2.74	1	right nasal cavity	1	0	1	CR	CR	CR	1	3	2014-10-22	2019-06-17	0	2019-06-17	55.8193	0	2019-06-17	55.8193	55.8193	9.35*10^-5	2.79*10^-7	335.125	1.45*10^-6	3.24*10^-7		1	0.7	53.1	55	30.5	83.5	94.6	31.1	101.6	2.69	0	0	0	0	0
284731	M	55	1	1	209.6	0	0.58	2	right nasal cavity, right cervica LN	0	2	0	PR	PR	CR	1	3	2014-10-30	2019-06-17	0	2019-06-17	55.5565	0	2019-06-17	55.5565	55.5565	8.76*10^-5	<1.0*10^-7	876	<1.0*10^-7	<1.0*10^-7		1.7	0.6	77.9	133.3	26.4	54.1	103.3	18.6	69.3	1.98	0	0	0	0	0
285920	M	32	1	1	173.3	2.31*10^3	0.94	2	nasopharyngeal parietal posterior wall, left turbinate	1	1	0	CR	CR	CR	1	2	2014-11-05	2019-06-17	1	2016-01-11	14.193	0	2019-06-17	55.3593	55.3593	1.31*10^-4	<1.0*10^-7	1310	<1.0*10^-7	<1.0*10^-7		1.1	0.5	86	59	28	99.2	172.4	24.6	97.5	0.88	1	0	0	0	0
285609	F	60	1	0	192.4	0	4.91	2	right tonsil	1	0	0	PR	PR	CR	1	2	2014-11-11	2019-06-17	0	2019-06-17	55.1622	0	2019-06-17	55.1622	55.1622	1.56*10^-4	3.74*10^-6	41.7112	3.86*10^-7	2.86*10^-7		2.5	0.7	85	292	25.5	17	15	18.8	65.2	4.2	0	0	0	0	0
289196	F	48	0	0	190.4	0	2.58	1	right nasal cavity,	0	0	0	CR	CR	CR	1	3	2014-12-17	2019-08-08	0	2019-08-08	55.6879	0	2019-08-08	55.6879	55.6879	1.56*10^-4	6.64*10^-7	234.94	1.49*10^-7	<1.0*10^-7		1.5	0.7	97	95	31.2	25.7	40	16.1	95.7	2.69	0	0	0	0	0
289765	M	18	1	1	166.7	6.06*10^3	1.34	2	bilateral nasal cavity,turbinate	1	1	0	PR	PR	CR	1	3	2014-12-30	2019-06-17	0	2019-06-17	53.5524	0	2019-06-17	53.5524	53.5524	1.66*10^-4	9.98*10^-7	166.333	1.12*10^-7	<1.0*10^-7		0.9	0.7	96	42	32.1	99.7	136.5	15.5	79.1	2.21	0	0	0	0	0
290358	M	42	2	1	377.8	8.45*10^3	70.27	2	nasopharynx，bilateral cervica LN	2	3	1	PR	PR	CR	1	3	2015-01-13	2015-11-17	1	2015-08-09	6.83368	1	2015-08-09	6.83368	10.1191	2.28*10^-4	1.92*10^-7	1187.5	<1.0*10^-7	<1.0*10^-7		0.7	0.9	76	50	27.3	94	121	17.8	84.1	3.66	2	0	0	0	0
291909	F	44	1	1	146.4	1.0*10^2	16.06	1	right tonsil	2	1	0	PR	PR	PR	1	0	2015-02-02	2016-06-07	1	2015-06-07	4.10678	1	2016-02-05	12.0903	16.1314	9.28*10^-4	4.01*10^-7	2314.21	6.63*10^-7	<1.0*10^-7		1.3	0.6	84.4	62	24.7	87.5	53.6	13.1	87.8	1.64	0	2	0	0	0
291992	M	51	1	1	492.2	3.81*10^3	3.8	2	nasopharynx，oropharynx	1	2	1	CR	CR	CR	1	2	2015-02-09	2019-08-08	0	2019-08-08	53.9138	0	2019-08-08	53.9138	53.9138	4.92*10^-5	1.77*10^-6	27.79	<1.0*10-7	<1.0*10-7		1.6	1.7	113.6	201.4	33.4	83.9	64.2	7	78.8	3.03	0	0	0	0	0
293067	F	44	1	0	149.3	0	0.57	2	bilateral nasal cavity,inferior turbinate	0	0	0	CR	CR	CR	1	3	2015-02-13	2019-08-08	0	2019-08-08	53.7823	0	2019-08-08	53.7823	53.7823	1.78*10^-4	<1.0*10^-7	1780	<1.0*10^-7	<1.0*10^-7		0.5	0.4	61.4	110	22.7	78.7	79.3	14.3	62	1.33	0	0	0	0	0
294990	M	73	2	1	173.1	4.02*10^3	6.63	4	nasopharynx，oropharynx LN，colon	3	3	4	PD	-	-	0	-	2015-03-17	2015-09-17	1	2015-05-30	2.43121	1	2015-06-29	3.41684	6.04518	1.72*10^-5	1.40*10^-6	12.28	<1.0*10-7	<1.0*10-7		3.4	1.1	102	67	27.7	102.2	156.3	21.3	167.7	0.91	0	0	0	0	0
296079	M	23	1	1	356.5	5.67*10^3	2.73	1	left nasal cavity	1	2	1	PR	PR	CR	1	3	2015-04-10	2019-08-08	0	2019-08-08	51.9425	0	2019-08-08	51.9425	51.9425	1.07*10^-4	3.87*10^-7	276.486	5.77*10^-7	<1.0*10^-7		0.5	0.7	90	144	26.6	31.4	49	27.6	98.1	2.71	0	0	0	0	0
298695	F	21	1	0	227.7	0	0.9	2	bilateral nasal cavity	0	0	0	CR	CR	CR	1	4	2015-05-25	2019-08-08	0	2019-08-08	50.4641	0	2019-08-08	50.4641	50.4641	7.45*10^-5	<1.0*10^-7	745	5.54*10^-6	2.51*10^-6		1.8	1.1	74	172	24.5	70.3	70.8	16.8	123	3.14	0	0	0	0	0
298833	M	28	1	0	155.6	1.23*10^3	1.11	2	right nasal cavity,bilateral cervica LN	2	1	0	CR	CR	CR	1	3	2015-05-18	2019-06-07	0	2019-06-07	48.6571	0	2019-06-07	48.6571	48.6571	1.46*10^-4	4.82*10^-7	302.905	<1.0*10^-7	<1.0*10^-7		0.6	0.4	86	89	26.7	59	92.2	77.1	80.1	1.91	0	1	0	0	0
299052	F	30	1	0	385	2.17*10^4	0.23	4	right forearm，bilateral inguinal LN，bilateral hips，bilateral thighs	4	3	3	PR	PR	CR	0	-	2015-05-14	2019-08-08	1	2019-08-08	50.8255	0	2019-08-08	50.8255	50.8255	6.08*10^-4	1.75*10^-7	3474.29	<1.0*10^-7	<1.0*10^-7		1.2	1.2	79	140	22	87.4	77.3	16	53.6	1.54	0	0	0	0	0
300208	M	56	1	0	269.7	2.1*10^2	19.77	1	right nasal cavity	1	1	1	CR	CR	CR	1	3	2015-06-02	2019-08-08	0	2019-08-08	50.2012	0	2019-08-08	50.2012	50.2012	2.27*10^-4	5.23*10^-5	4.34034	1.57*10^-5	5.49*10^-6		0.6	0.1	68	61	25.5	62.4	98.6	94.2	77	0.84	2	0	0	0	0
303617	M	50	1	1	221.8	1.64*10^3	13.44	1	left nasal cavity	1	1	0	CR	CR	CR	1	4	2015-07-29	2019-08-08	0	2019-08-08	48.3285	0	2019-08-08	48.3285	48.3285	1.09*10^-4	5.35*10^-7	203.738	1.81*10^-7	<1.0*10^-7		0.7	0.9	75	123	21.6	65	91.2	14.1	67.5	3.52	0	0	0	0	0
304544	M	58	1	0	147.5	3.07*10^3	12.33	2	bilateral nasal cavity，ethmoid sinus，bilateral cervica LN	2	1	0	PR	PR	CR	1	2	2015-07-17	2016-03-15	1	2016-03-15	7.95072	1	2016-03-15	7.95072	7.95072	4.51*10^-4	5.51*10^-7	818.512	2.83*10^-6	9.66*10^-7		3	0.5	64	222	24.2	32.9	36.3	10.9	111.3	2.9	0	0	0	0	0
305497	M	23	1	1	290.3	61.9	1.96	2	nasopharynx，bilateral cervica LN	1	3	1	PR	PR	CR	1	4	2015-08-30	2019-08-08	0	2019-08-08	47.2772	0	2019-08-08	47.2772	47.2772	1.11*10^-4	3.74*10^-7	296.791	1.37*10^-7	<1.0*10^-7		0.5	0.8	61	26	20.8	47	66.9	41.9	109.1	1.98	2	0	0	0	0
